# Supplementary material for: Promising transition metal decorated borophene catalyst for water splitting
Source: Royal Society of Chemistry journal article supplement (doi:10.1039/d3ra00299c), 2023-01-01
Supplement: d3ra00299c1.pdf [file d3ra00299c1.pdf]

## Supplementary Information

### Promising transition metal decorated borophene catalyst for water splitting

Rongzhi Wang<sup>1</sup> and Jin-Cheng Zheng<sup>1,2\*</sup>

1 Department of Physics, Fujian Provincial Key Laboratory of Theoretical and Computational Chemistry, Xiamen University, Xiamen 361005, China

2 Department of Physics and Department of New Energy Science and Engineering, Xiamen University Malaysia, Sepang 43900, Malaysia

\* corresponding author, email: jczheng@xmu.edu.cn

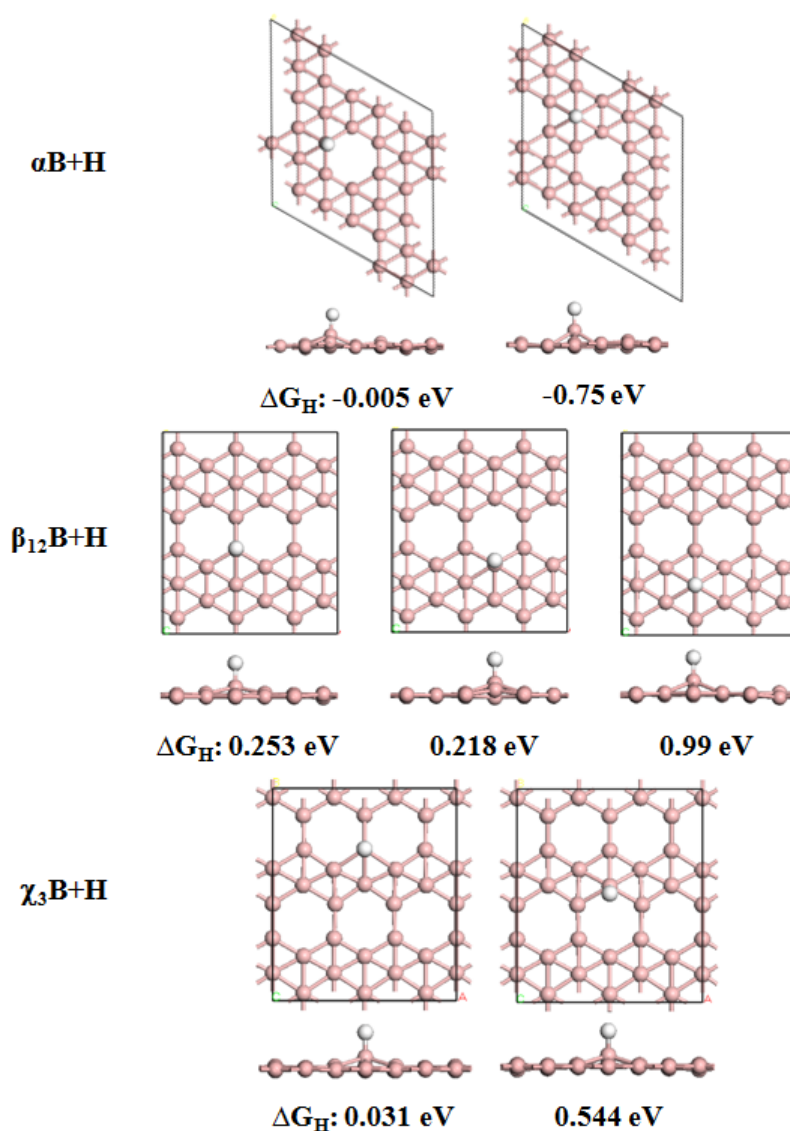

**Fig. S1** The top and side views of H adsorption structures of  $\alpha\text{B}$ ,  $\beta_{12}\text{B}$  and  $\chi_3\text{B}$ ; the corresponding H adsorption free energies are listed below the structures. The pink ball represents B atom and white ball represents H atom.

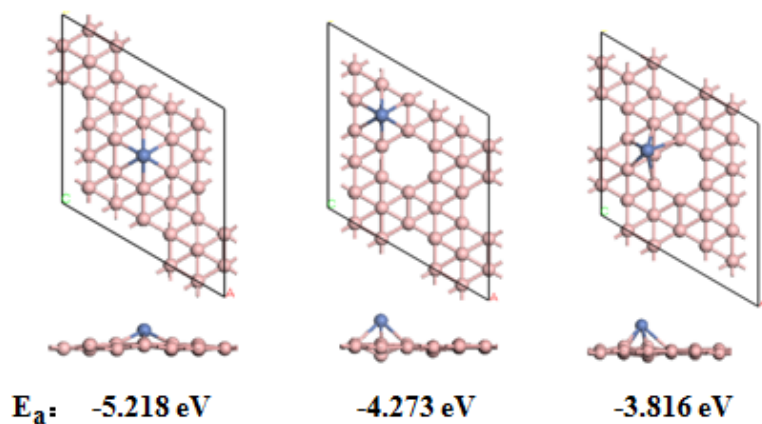

Fig. S2 Ni adsorption sites and adsorption energies on  $\alpha$ B.

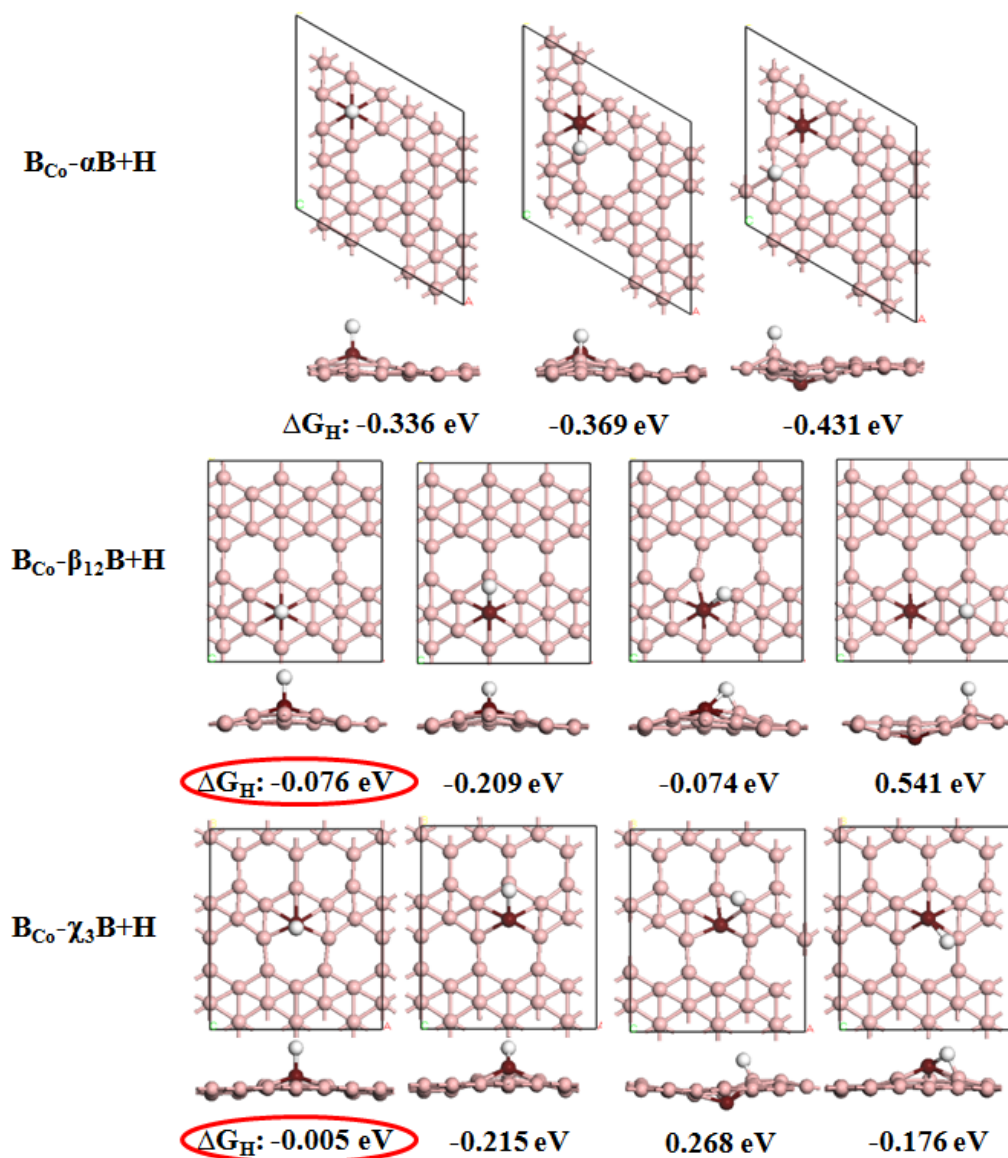

Fig. S3 The top and side views of H adsorption structures of  $B_{Co}$ -doped  $\alpha$ B,  $B_{Co}$ -doped  $\beta_{12}B$  and  $B_{Co}$ -doped  $\chi_3B$ ; the corresponding H adsorption free energies are listed below the structures. Here, the pink, brown and white balls represent B, Co and H atoms, respectively.

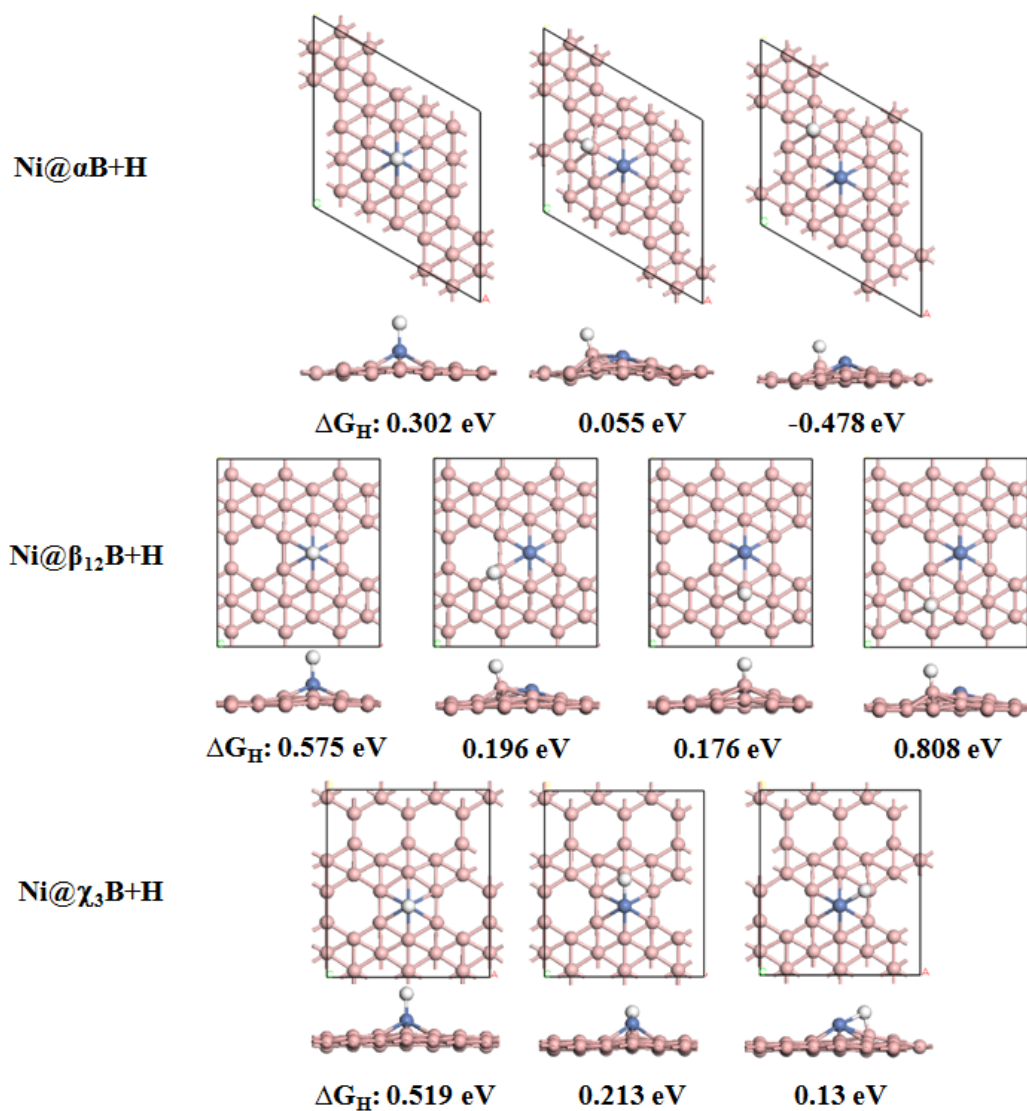

**Fig. S4** The top and side views of H adsorption structures of Ni-doped  $\alpha$ B, Ni-doped  $\beta_{12}$ B and Ni-doped  $\chi_3$ B; the corresponding H adsorption free energies are listed below the structures. Here, the pink, blue and white balls represent B, Ni and H atoms, respectively.

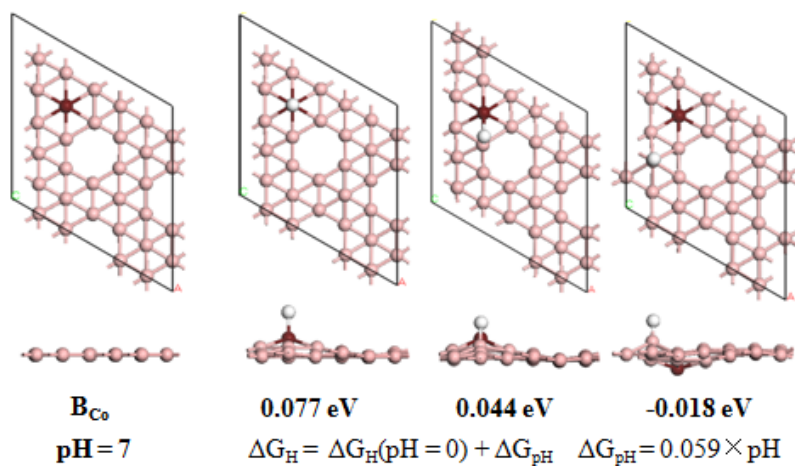

**Fig. S5** H adsorption sites and free energies on B<sub>Co</sub>-doped  $\alpha$ B when pH = 7.

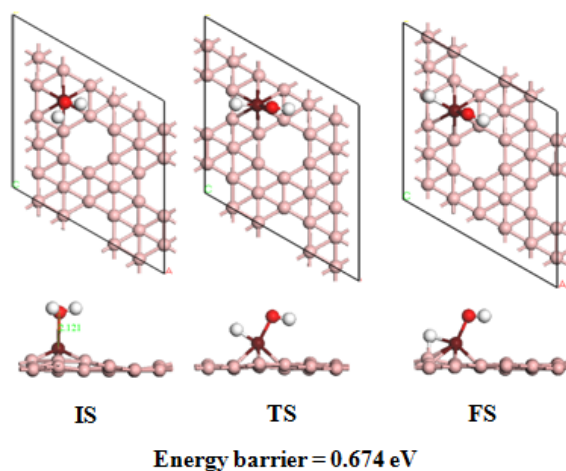

**Fig. S6** Initial state (IS), transition state (TS), final state (FS) for water dissociation on  $B_{Co}$ -doped  $\alpha B$ . Here, the pink, brown, red and white balls represent B, Co, O and H atoms, respectively.

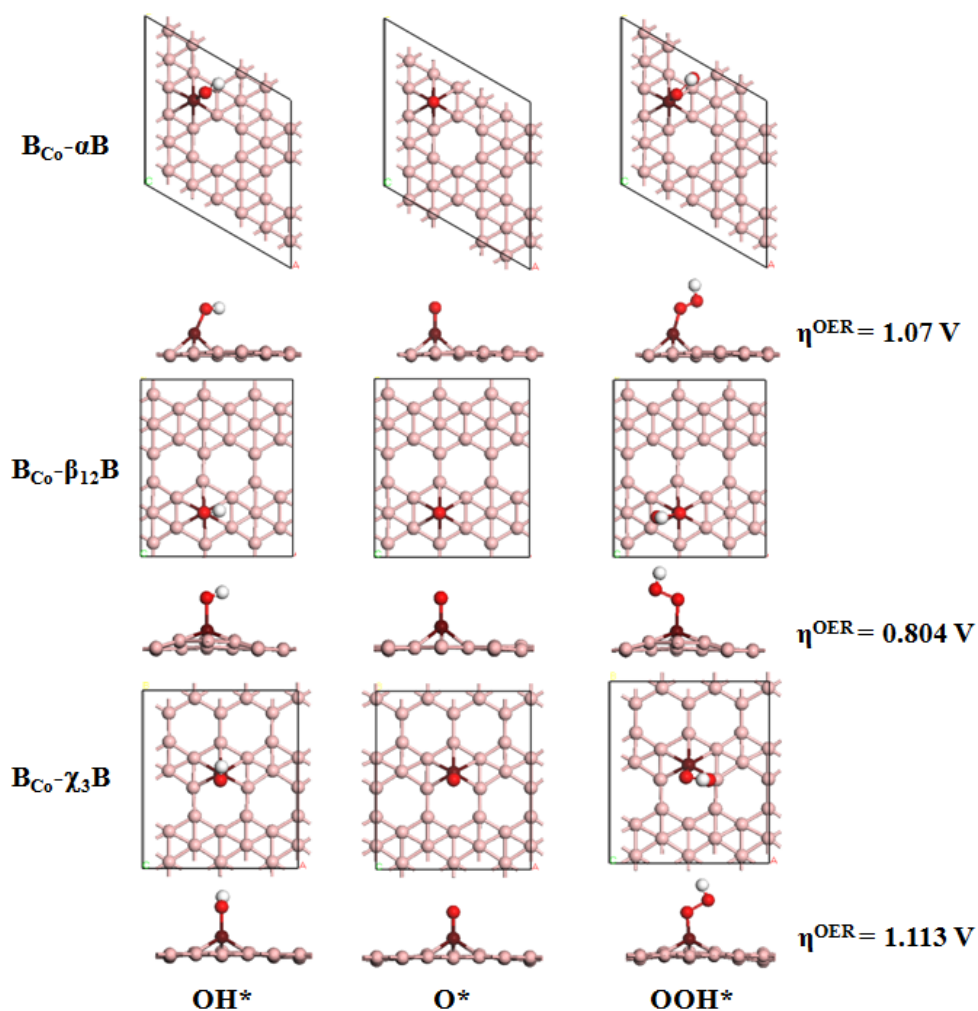

**Fig. S7** The top and side views of structures of the adsorbed intermediates ( $OH^*$ ,  $O^*$  and  $OOH^*$ ) on  $B_{Co}$ -doped borophenes. The overpotentials are listed on the right side of the structures. Here, the pink, brown, red and white balls represent B, Co, O and H atoms, respectively.

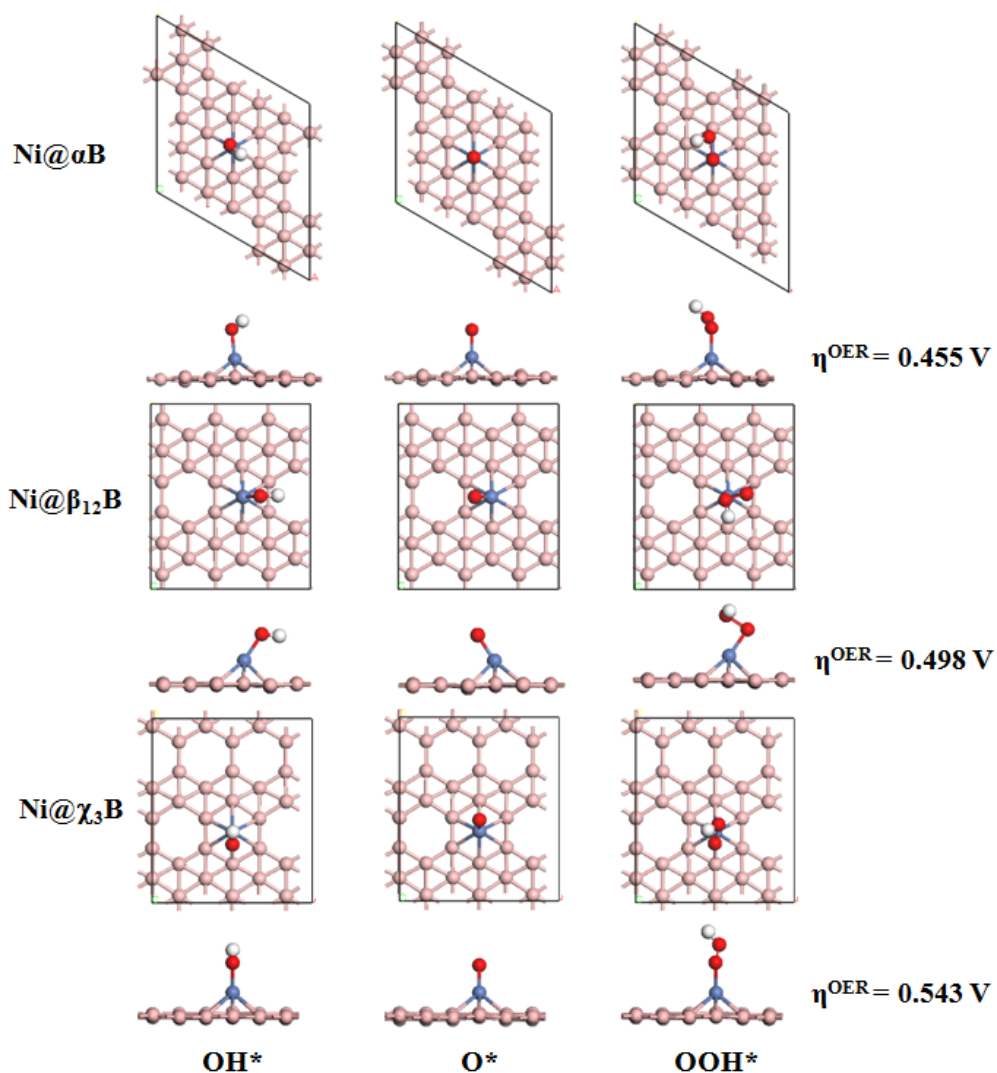

**Fig. S8** The top and side views of structures of the adsorbed intermediates (OH\*, O\* and OOH\*) on Ni- doped borophenes. The overpotentials are listed on the right side of the structures. Here, the pink, blue, red and white balls represent B, Ni, O and H atoms, respectively.

**Table. S1** The reaction Gibbs free energy ( $\Delta G_1$ ,  $\Delta G_2$ ,  $\Delta G_3$  and  $\Delta G_4$ ) of four elementary steps and overpotential ( $\eta^{\text{OER}}$ ) for OER.

|                                                | $\Delta G_1/\text{eV}$ | $\Delta G_2/\text{eV}$ | $\Delta G_3/\text{eV}$ | $\Delta G_4/\text{eV}$ | $\eta^{\text{OER}}/\text{V}$ |
|------------------------------------------------|------------------------|------------------------|------------------------|------------------------|------------------------------|
| <b>B<sub>C0</sub>-<math>\alpha</math>B</b>     | -0.278                 | 0.82                   | 2.3                    | 2.078                  | 1.07                         |
| <b>B<sub>C0</sub>-<math>\beta_{12}</math>B</b> | 1.126                  | 1.068                  | 2.034                  | 0.692                  | 0.804                        |
| <b>B<sub>C0</sub>-<math>\chi_3</math>B</b>     | 0.299                  | 0.762                  | 2.343                  | 1.516                  | 1.113                        |
| <b>Ni@<math>\alpha</math>B</b>                 | 0.627                  | 1.685                  | 1.537                  | 1.071                  | 0.455                        |
| <b>Ni@<math>\beta_{12}</math>B</b>             | 1.001                  | 1.492                  | 1.728                  | 0.699                  | 0.498                        |
| <b>Ni@<math>\chi_3</math>B</b>                 | 0.583                  | 1.434                  | 1.773                  | 1.13                   | 0.543                        |

**Table. S2** The adsorption energies of intermediates (OH\*, O\* and OOH\*) on B<sub>C<sub>0</sub></sub>- and Ni- doped borophenes in OER process.

|                                                                   | <b>*OH</b> | <b>*O</b> | <b>*OOH</b> |
|-------------------------------------------------------------------|------------|-----------|-------------|
| <b>B<sub>C<sub>0</sub></sub>-<math>\alpha</math>B</b>             | -0.664     | 0.492     | 2.392       |
| <b>B<sub>C<sub>0</sub></sub>-<math>\beta</math><sub>12</sub>B</b> | 0.746      | 2.14      | 3.772       |
| <b>B<sub>C<sub>0</sub></sub>-<math>\chi</math><sub>3</sub>B</b>   | -0.067     | 1.004     | 2.944       |
| <b>Ni@<math>\alpha</math>B</b>                                    | 0.265      | 2.271     | 3.401       |
| <b>Ni@<math>\beta</math><sub>12</sub>B</b>                        | 0.621      | 2.45      | 3.743       |
| <b>Ni@<math>\chi</math><sub>3</sub>B</b>                          | 0.201      | 1.97      | 3.328       |
